# Supplementary material for: Mmu-miR-1894-3p Inhibits Cell Proliferation and Migration of Breast Cancer Cells by Targeting Trim46
Source: Int J Mol Sci. 2016 Apr 22;17(4):609. doi: 10.3390/ijms17040609 (PMC4849059; doi:10.3390/ijms17040609)
Supplement: Supplementary file 1 [file ijms-17-00609-s001.pdf]

# Supplementary Materials: Mmu-miR-1894-3p Inhibits Cell Proliferation and Migration of Breast Cancer Cells by Targeting Trim46

Li Zhang, Xiaoying Li, Wei Dong, Caixian Sun, Deyu Guo and Lianfeng Zhang

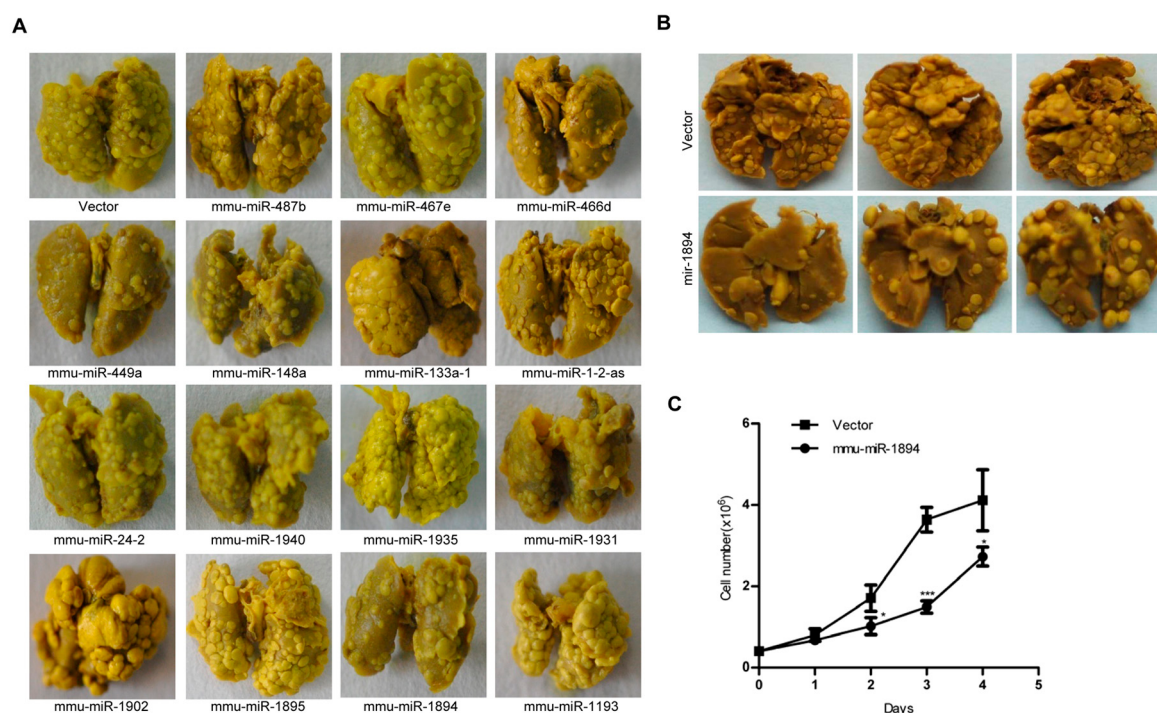

**Figure S1.** Fifteen mouse microRNAs and lung metastasis assay. **(A)** 4TO7 mouse breast cancer cells were transfected with empty vector or fifteen individual microRNA expression plasmids, including miR-487b, miR-467e, miR-466d, miR-449a, miR-148a, miR-133a-1, miR-1-2-as, miR-24-2, miR-1940, miR-1935, miR-1931, miR-1902, miR-1895, miR-1894, and miR-1193. Stable cell lines were generated and  $1 \times 10^6$  cells were injected into the tail veins of Balb/c female mice ( $n = 6$  for each group). Two weeks later, the mice were sacrificed; the lungs were fixed in Bouin's solution and photographed. Shown are the representative photos for lung metastasis nodules (one lung for each microRNA); **(B)** Representative photos for lung metastasis of 4TO7 cells expressing miR-1894 and the vector control; and **(C)** 4TO7 cells expressing miR-1894 and vector control were seeded into 24-well plates at  $1 \times 10^4$  cells/well and counted using Trypan Blue after 24, 48, 72 and 96 h. Growth curves were made from data of cell counting for four days. \* indicates  $p < 0.05$ ; \*\*\* indicates  $p < 0.001$  versus vector control.

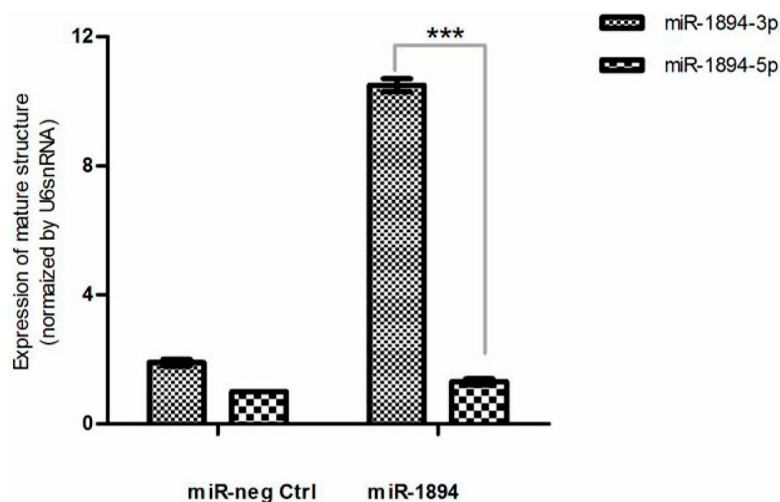

**Figure S2.** The expression level of two mature structures of miR-1894 in 4TO7 mouse breast cancer cells. miR-1894 produces two mature structure forms, miR-1894-3p and miR-1894-5p. The expression of miR-1894-3p and miR-1894-5p in 4TO7 cells expressing miR-1894 and the vector control was detected by real-time PCR. \*\*\* indicates  $p < 0.001$  miR-1894-3p versus miR-1894-5p.

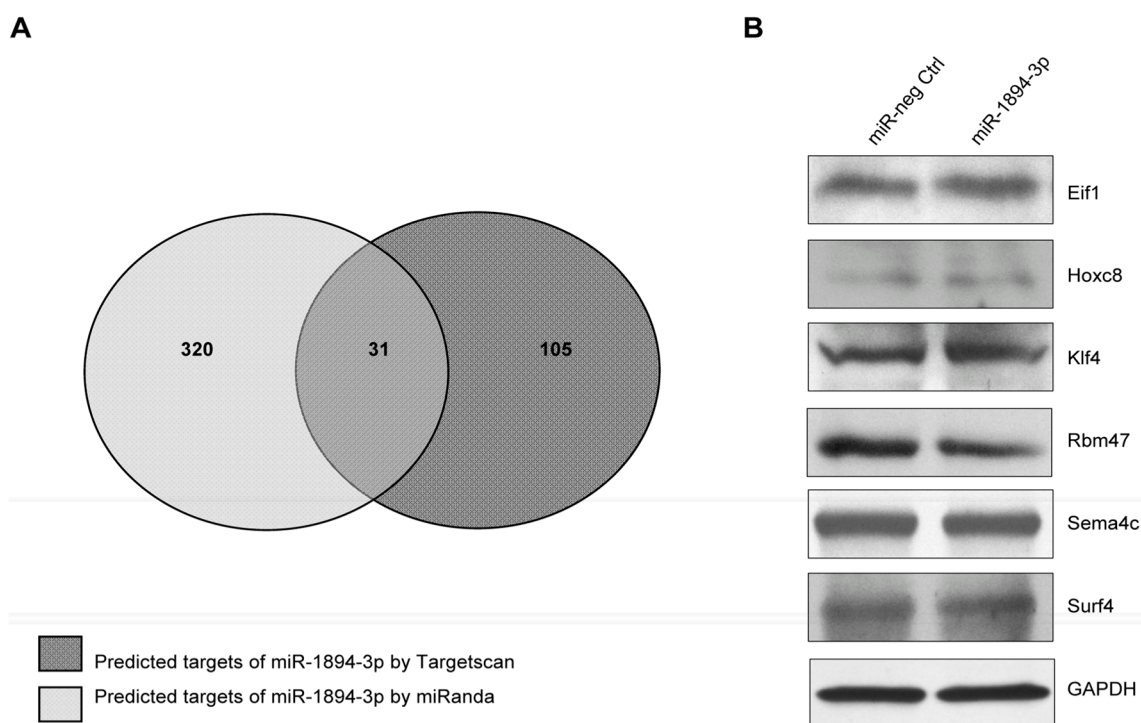

**Figure S3.** Identification of potential target genes. (A) miR-1894-3p targets were predicted using the TargetScan and miRanda programs, and the lists of predicted targets were merged, resulting in 31 genes as candidates for direct targeting by miR-1894-3p. (B) Seven genes (Eif1, Hoxc8, Klf4, Rbm47, Sema4c, Surf4 and Trim46) were selected as candidate targets of miR-1894-3p; and (B) Immunoblotting was carried out with antibodies specific for Eif1(1:200, Santa Cruz), HOXC8 (mAb; 1:1000; Abcam), KLF4 (1:1000, Abcam), Rbm47 (1:1000, Novus Biologicals), Sema4c (1:500, Bioss) SURF4-C-terminal (1:1000, Abcam), Trim46 (1:2000, Proteintech), Primary antibodies were visualized with anti-rabbit HRP conjugated secondary antibodies. GAPDH was used for normalization.

**Table S1.** Thirty-one potential targets predicted by TargetScan and MiRanda programs.

| No. | Representative Transcript | Gene Name                                                                                                        |
|-----|---------------------------|------------------------------------------------------------------------------------------------------------------|
| 1   | NM_175123                 | RIKEN cDNA 1110051M20 gene                                                                                       |
| 2   | NM_001081400              | RIKEN cDNA 1810013L24 gene                                                                                       |
| 3   | NM_002892                 | AT rich interactive domain 4A (RBP1-like)                                                                        |
| 4   | NM_001126054              | Calcium/calmodulin-dependent serine protein kinase (MAGUK family)                                                |
| 5   | NM_001173982              | Carbohydrate (chondroitin 4) sulfotransferase 11                                                                 |
| 6   | NM_008176                 | Chemokine (C-X-C motif) ligand 1                                                                                 |
| 7   | NM_005801                 | Eukaryotic translation initiation factor 1                                                                       |
| 8   | NM_001013415              | F-box and WD repeat domain containing 7                                                                          |
| 9   | NM_022658                 | Homeobox C8                                                                                                      |
| 10  | NM_001034914              | Kcnp3 Kv channel interacting protein 3, calsenilin                                                               |
| 11  | NM_000899                 | KIT ligand                                                                                                       |
| 12  | NM_004235                 | Kruppel-like factor 4 (gut)                                                                                      |
| 13  | NM_001080774              | Myosin IC                                                                                                        |
| 14  | NM_002522                 | Nptx1 neuronal pentraxin I                                                                                       |
| 15  | NM_004161                 | RAB1A, member RAS oncogene family                                                                                |
| 16  | NM_001098634              | RNA binding motif protein 47                                                                                     |
| 17  | NM_172612                 | Rnd1Rho family GTPase 1                                                                                          |
| 18  | NM_017789                 | Sema domain, immunoglobulin domain (Ig), transmembrane domain (TM) and short cytoplasmic domain, (semaphorin) 4C |
| 19  | NM_001172700              | Shroom family member 1                                                                                           |
| 20  | NM_001128225              | Solute carrier family 39 (zinc transporter), member 13                                                           |
| 21  | NM_000342                 | Solute carrier family 4, anion exchanger, member 1 (erythrocyte membrane protein band 3, Diego blood group)      |
| 22  | NM_011512                 | Surfeit gene 4                                                                                                   |
| 23  | NM_006950                 | Synapsin I                                                                                                       |
| 24  | NM_015527                 | TBC1 domain family, member 10B                                                                                   |
| 25  | NM_001033422              | THO complex 2                                                                                                    |
| 26  | NM_001126339              | Thiamine triphosphatase                                                                                          |
| 27  | NM_001039466              | Tripartite motif-containing 46                                                                                   |
| 28  | NM_025692                 | Ubiquitin-like modifier activating enzyme5                                                                       |
| 29  | NM_003680                 | Tyrosyl-tRNA synthetase                                                                                          |
| 30  | NM_152758                 | YTH domain family, member 3                                                                                      |
| 31  | NM_014827                 | Zinc finger CCCH-type containing 11A                                                                             |
